# Supplementary material for: Hepatitis C Virus Nonstructural 3/4A Protein Dampens Inflammation and Contributes to Slow Fibrosis Progression during Chronic Fibrosis In Vivo
Source: PubMed Central journal article supplement (PMC4450868; doi:10.1371/journal.pone.0128466), 2015-06-01
Supplement: pone.0128466.s006.pdf [file pone.0128466.s006.pdf]

**S1 Table: Primary and secondary antibodies used for the immunohistological stainings**

| Primary Antibody                   | Source            | Dilution |
|------------------------------------|-------------------|----------|
| Polyclonal rabbit $\alpha$ -SMA    | Abcam             | 1:100    |
| Polyclonal goat anti-collagen I    | Southern Biotech  | 1:100    |
| Polyclonal goat anti-collagen III  | Southern Biotech  | 1:100    |
| Polyclonal rabbit Cytokeratin 19   | Novus Biologicals | 1:100    |
| Polyclonal goat anti-desmin        | Santa Cruz        | 1:100    |
| Polyclonal rat anti-F4/80 (MCA497) | AbD Serotec       | 1:500    |
| Polyclonal rabbit anti-Ki67        | Millipore         | 1:100    |
| Secondary Antibody                 | Source            | Dilution |
| Polyclonal Goat anti-rabbit IgG    | DAKO              | 1:100    |
| Polyclonal Rabbit anti-rat IgG     | DAKO              | 1:100    |
| Polyclonal Rabbit anti-Goat IgG    | DAKO              | 1:100    |
