# Supplementary material for: Hepatitis C Virus Nonstructural 3/4A Protein Dampens Inflammation and Contributes to Slow Fibrosis Progression during Chronic Fibrosis In Vivo
Source: PubMed Central journal article supplement (PMC4450868; doi:10.1371/journal.pone.0128466), 2015-06-01
Supplement: pone.0128466.s007.pdf [file pone.0128466.s007.pdf]

**S2 Table: Sequence of the primers used for the quantitative real-time PCR**

| Gene                     | Forward primer sequence (5'-3') | Reverse primer sequence (5'-3') |
|--------------------------|---------------------------------|---------------------------------|
| Bax                      | CTCAAGGCCCTGTGCACTAA            | CACGGAGGAAGTCCAGTGTC            |
| Bcl2                     | CTTTGAGTTCGGTGGGGTCA            | AGTTCCACAAAGGCATCCCA            |
| CD68                     | TTCTGCTGTGGAAATGCAAG            | AGAGGGGCTGGTAGGTTGAT            |
| Cyclin D1                | CCATGCTCAAGACGGAGGAG            | ATCCAGGTGGCCACGATTTT            |
| CYP2E1                   | AAGAATGAGTTCTCTGGCCG            | CCAGTCACGGAGGATACTTA            |
| Desmin                   | ATGCAGCCACTCTAGCTCGT            | CTCATACTGAGCCCGGATGT            |
| F4/80 (EMR1)             | TGCATCTAGCAATGGACAGC            | GCCTTCTGGATCCATTTGAA            |
| GAPDH                    | ACAGTCCATGCCATCACTGC            | GATCCACGACGGACACATTG            |
| IFN $\gamma$             | AGCAAGGCGAAAAAGGATGC            | TCATTGAATGCTTGGCGCTG            |
| IL-1 $\beta$             | GCCAAGACAGGTCGCTCAGGG           | CCCCCACACGTTGACAGCTAGG          |
| IL-13                    | GTATGGAGTGTGGACCTGGC            | CTCTGGGTCCTGTAGATGGC            |
| Ly6C2                    | TGGACAGTACTCACGCTACA            | GGCACTCCATAGCACTCGTA            |
| MCP1 (CCL2)              | GTGCTGACCCCAAGAAGGAA            | GTGCTGAAGACCTTAGGGCA            |
| MMP13                    | CCAGAACTTCCCAACCATGT            | GTCTTCCCCGTGTTCTCAA             |
| MMP9                     | CGTCGTGATCCCCACTTACT            | AACACACAGGGTTTGCCTTC            |
| NS3/4A                   | GTTGTCGTCGTGGCAACTG             | GAGGAAGCGTGGTTGTCTCA            |
| Procollagen 1 $\alpha$ 1 | TGACTGGAAGAGCGGAGAGT            | ATCCATCGGTCATGCTCTCT            |
| Procollagen 3 $\alpha$ 1 | ACTGTCCCACGTAAGCACTG            | CAGGAGGGCCATAGCTGAAC            |
| TGF $\beta$              | GGACTCTCCACCTGCAAGAC            | CTGGCGAGCCTTAGTTTGGGA           |
| TNF $\alpha$             | AGGCTGCCCCGACTACGTGC            | CAGCGCTGAGTTGGTCCCCC            |
| YM1 or CHI3L3            | ACTTTGATGGCCTCAACCTG            | AATGATTCTGCTCCTGTGG             |
| $\alpha$ -sma            | ACTACTGCCGAGCGTGAGAT            | CCAATGAAAGATGGCTGGAA            |

**Abbreviations:**  $\alpha$ -sma, alpha smooth muscle actin; Bax, Bcl2-associated X protein; Bcl2, B-cell CLL/lymphoma 2; MCP1 (CCL2), macrophage chemotactic protein 1 (chemokine C – C motif ligand 2); CD68, cluster of differentiation 68; F4/80 or EMR1, EGF-like module-containing mucin-like hormone receptor-like 1; GAPDH, Glyceraldehyde 3-phosphate dehydrogenase; IL-1 $\beta$ , Interleukin 1 beta; Ly6C2, mouse lymphocyte antigen 6 complex, locus C2; MMP9 or MMP13, Matrix metalloproteinase 9 or 13; TNF $\alpha$ , tumor necrosis factor alpha; YM1 or CHI3L3, chitinase 3-like-3; CYP2E1, Cytochrome P450 E1; TGF $\beta$ , Transforming growth factor; NS3/4A, Nonstructural protein 3/4A; IL-13, Interleukin-13; IFN $\gamma$ , Interferon gamma.
